## S1 Basic Concepts in Information Theory

Consider a random variable  $X$  with probability distribution  $p(x) \equiv p(X = x)$ . In the discrete case, the *Shannon* entropy is defined as:

$$H(X) = - \sum_x p(x) \log p(x) \quad (14)$$

Note that If  $X$  is a continuous variable, the sum in Eq. 14 is replaced by an integral. We often talk about the entropy  $H(X)$  s quantifying our uncertainty about the random variable, so that higher entropy means more uncertain (and less predictable)  $X$ . In particular, entropy is zero,  $H(X) = 0$ , if and only if  $X$  is perfectly predictable.

Let us now consider two random variables,  $X$  and  $Y$ , and let  $p(x, y)$  denote their joint distribution. The (joint) entropy for  $X$  and  $Y$  is defined similarly as

$$H(X, Y) = - \sum_x \sum_y p(x, y) \log p(x, y) \quad (15)$$

We can also define conditional entropy of  $Y$  given  $X$  (or vice versa), as follows:

$$H(Y|X) = - \sum_x p(x) \sum_y p(y|x) \log p(y|x) \quad (16)$$

If  $X$  and  $Y$  are independent, then their joint entropy is the sum of individual entropies,  $H(X, Y) = H(X) + H(Y)$ . Indeed, note that for independent  $X$  and  $Y$ , their joint distribution factorizes as  $p(x, y) = p(x)p(y)$ . Plugging this factorized distribution into Eq. 15 then yields the additivity of the joint entropy.

In case  $X$  and  $Y$  are not independent, the degree of their dependence can be measured by *mutual information* (MI), defined as follows:

$$I(X : Y) = H(X) + H(Y) - H(X, Y) \quad (17)$$

$I(X : Y)$  measures the correlation between  $X$  and  $Y$ , and equals to zero if and only if  $X$  and  $Y$  are independent. In essence,  $I(X : Y)$  measures the amount of uncertainty reduction in  $X$ , if we know  $Y$ , and vice visa. This intuition becomes more clear if we rewrite the mutual information the in the following form:

$$I(X : Y) = H(Y) - H(Y|X) \quad (18)$$

$$= H(X) - H(X|Y) \quad (19)$$

The relationships between the entropies, conditional entropies, and mutual information are captured in the Venn diagram shown in Fig. A.

For a more detailed account of information-theoretic concepts, we refer the reader to a classical textbook by Cover and Thomas [9].

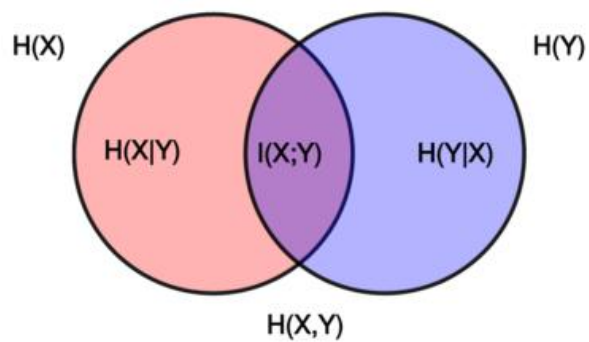

**Figure A.** The Venn diagram depicting the relationship between individual ( $H(X)$ ,  $H(Y)$ ), joint ( $H(X, Y)$ ), and conditional ( $H(X|Y)$ ,  $H(Y|X)$ ) entropies. The intersection of the circles is the mutual information  $I(X; Y)$ .
